# Supplementary material for: From Clinical Specimen to Whole Genome Sequencing of A(H3N2) Influenza Viruses: A Fast and Reliable High-Throughput Protocol
Source: MDPI journal article supplement (doi:10.3390/vaccines10081359), 2022-08-19
Supplement: s1 [file s1]

**Table S1:** Demographical and virological data of study population.

| Sample ID | Gender | Age (year) | Province of origin | Sample type             | Collection date  | A(H3N2) strain name | A(H3N2) viral load (copies/ml) |
|-----------|--------|------------|--------------------|-------------------------|------------------|---------------------|--------------------------------|
| 1         | Male   | 49,0       | Milan              | oropharyngeal swab      | 21 November 2016 | A/Milano/77/2016    | 9,E+06                         |
| 2         | Male   | 12,1       | Bergamo            | oropharyngeal swab      | 22 November 2016 | A/Milano/78/2016    | 4,E+07                         |
| 3         | Male   | 3,1        | Bergamo            | oropharyngeal swab      | 23 November 2016 | A/Milano/79/2016    | 4,E+06                         |
| 4         | Male   | 4,2        | Bergamo            | oropharyngeal swab      | 05 December 2016 | A/Milano/91/2016    | 2,E+07                         |
| 5         | Male   | 24,2       | Brescia            | oropharyngeal swab      | 15 December 2016 | A/Milano/96/2016    | 2,E+06                         |
| 6         | Male   | 65,5       | Milan              | oropharyngeal swab      | 15 December 2016 | A/Milano/98/2016    | 3,E+06                         |
| 7         | Male   | 13,9       | Milan              | oropharyngeal swab      | 19 December 2016 | A/Milano/108/2016   | 4,E+07                         |
| 8         | Male   | 38,9       | Mantova            | oropharyngeal swab      | 19 December 2016 | A/Milano/113/2016   | 2,E+06                         |
| 9         | Male   | 62,1       | Varese             | oropharyngeal swab      | 10 December 2016 | A/Milano/100/2016   | 5,E+06                         |
| 10        | Male   | 69,7       | Varese             | oropharyngeal swab      | 20 December 2016 | A/Milano/117/2016   | 2,E+06                         |
| 11        | Female | 48,3       | Mantova            | oropharyngeal swab      | 12 December 2016 | A/Milano/102/2016   | 6,E+04                         |
| 12        | Female | 36,0       | Bergamo            | oropharyngeal swab      | 20 December 2016 | A/Milano/118/2016   | 1,E+08                         |
| 13        | Female | 14,7       | Milan              | oropharyngeal swab      | 27 December 2016 | A/Milano/121/2016   | 2,E+06                         |
| 14        | Male   | 46,3       | Milan              | oropharyngeal swab      | 23 December 2016 | A/Milano/119/2016   | 1,E+08                         |
| 15        | Female | 5,2        | Bergamo            | oropharyngeal swab      | 28 December 2016 | A/Milano/128/2016   | 8,E+07                         |
| 16        | Female | 83,3       | Varese             | oropharyngeal swab      | 23 December 2016 | A/Milano/120/2016   | 2,E+05                         |
| 17        | Female | 78,3       | Varese             | oropharyngeal swab      | 27 December 2016 | A/Milano/132/2016   | 5,E+06                         |
| 18        | Female | 82,3       | Varese             | oropharyngeal swab      | 27 December 2016 | A/Milano/133/2016   | 1,E+04                         |
| 19        | Female | 50,4       | Brescia            | oropharyngeal swab      | 28 December 2016 | A/Milano/146/2016   | 7,E+05                         |
| 20        | Female | 59,0       | Milan              | oropharyngeal swab      | 15 December 2016 | A/Milano/135/2016   | 4,E+06                         |
| 21        | Male   | 72,6       | Mantova            | oropharyngeal swab      | 30 December 2016 | A/Milano/151/2016   | 1,E+08                         |
| 22        | Female | 77,6       | Mantova            | oropharyngeal swab      | 29 December 2016 | A/Milano/152/2016   | 7,E+08                         |
| 23        | Male   | 72,8       | Mantova            | oropharyngeal swab      | 27 December 2016 | A/Milano/153/2016   | 1,E+06                         |
| 24        | Female | 65,8       | Brescia            | broncho-alveolar lavage | 03 November 2016 | A/Milano/157/2016   | 9,E+07                         |
| 25        | Male   | 74,7       | Brescia            | broncho-alveolar lavage | 05 December 2016 | A/Milano/158/2016   | 3,E+08                         |
| 26        | Female | 43,1       | Milan              | oropharyngeal swab      | 09 January 2017  | A/Milano/67/2017    | 4,E+06                         |
| 27        | Male   | 50,7       | Brescia            | oropharyngeal swab      | 02 January 2017  | A/Milano/3/2017     | 1,E+05                         |
| 28        | Male   | 67,8       | Brescia            | oropharyngeal swab      | 02 January 2017  | A/Milano/4/2017     | 3,E+07                         |
| 29        | Female | 71,5       | Brescia            | oropharyngeal swab      | 02 January 2017  | A/Milano/5/2017     | 5,E+05                         |
| 30        | Male   | 61,6       | Varese             | oropharyngeal swab      | 02 January 2017  | A/Milano/10/2017    | 3,E+07                         |
| 31        | Male   | 50,2       | Milan              | oropharyngeal swab      | 02 January 2017  | A/Milano/17/2017    | 2,E+06                         |
| 32        | Male   | 84,2       | Mantova            | oropharyngeal swab      | 02 January 2017  | A/Milano/19/2017    | 4,E+04                         |
| 33        | Male   | 78,8       | Mantova            | oropharyngeal swab      | 02 January 2017  | A/Milano/21/2017    | 4,E+06                         |
| 34        | Male   | 14,5       | Bergamo            | oropharyngeal swab      | 10 January 2017  | A/Milano/29/2017    | 2,E+05                         |
| 35        | Female | 72,0       | Milan              | oropharyngeal swab      | 09 January 2017  | A/Milano/31/2017    | 8,E+05                         |
| 36        | Male   | 74,7       | Milan              | oropharyngeal swab      | 10 January 2017  | A/Milano/39/2017    | 3,E+08                         |
| 37        | Female | 58,1       | Brescia            | oropharyngeal swab      | 04 January 2017  | A/Milano/26/2017    | 2,E+07                         |
| 38        | Female | 62,7       | Brescia            | oropharyngeal swab      | 05 January 2017  | A/Milano/27/2017    | 2,E+06                         |
| 39        | Female | 28,0       | Brescia            | oropharyngeal swab      | 10 January 2017  | A/Milano/52/2017    | 8,E+07                         |
| 40        | Male   | 68,6       | Brescia            | broncho-alveolar lavage | 07 January 2017  | A/Milano/50/2017    | 4,E+06                         |
| 41        | Male   | 1,6        | Brescia            | broncho-alveolar lavage | 03 January 2017  | A/Milano/51/2017    | 4,E+07                         |
| 42        | Male   | 10,2       | Bergamo            | oropharyngeal swab      | 13 January 2017  | A/Milano/57/2017    | 1,E+08                         |
| 43        | Male   | 6,3        | Bergamo            | oropharyngeal swab      | 13 January 2017  | A/Milano/58/2017    | 1,E+10                         |
| 44        | Female | 6,4        | Bergamo            | oropharyngeal swab      | 18 January 2017  | A/Milano/71/2017    | 1,E+05                         |

|    |        |      |               |                         |                  |                   |        |
|----|--------|------|---------------|-------------------------|------------------|-------------------|--------|
| 45 | Female | 76,0 | Bergamo       | oropharyngeal swab      | 17 January 2017  | A/Milano/74/2017  | 4,E+05 |
| 46 | Female | 57,0 | Bergamo       | oropharyngeal swab      | 17 January 2017  | A/Milano/77/2017  | 7,E+08 |
| 47 | Male   | 62,0 | Milan         | oropharyngeal swab      | 12 January 2017  | A/Milano/64/2017  | 6,E+05 |
| 48 | Female | 5,5  | Milan         | oropharyngeal swab      | 16 January 2017  | A/Milano/80/2017  | 9,E+06 |
| 49 | Male   | 72,2 | Milan         | oropharyngeal swab      | 16 January 2017  | A/Milano/81/2017  | 1,E+09 |
| 50 | Female | 70,3 | Milan         | oropharyngeal swab      | 17 January 2017  | A/Milano/82/2017  | 8,E+04 |
| 51 | Female | 84,3 | Mantova       | oropharyngeal swab      | 17 January 2017  | A/Milano/85/2017  | 1,E+10 |
| 52 | Male   | 80,6 | Varese        | oropharyngeal swab      | 16 January 2017  | A/Milano/88/2017  | 2,E+06 |
| 53 | Female | 77,0 | Brescia       | oropharyngeal swab      | 18 January 2017  | A/Milano/90/2017  | 4,E+06 |
| 54 | Male   | 10,9 | Bergamo       | oropharyngeal swab      | 23 January 2017  | A/Milano/103/2017 | 4,E+06 |
| 55 | Female | 72,9 | Milan         | oropharyngeal swab      | 23 January 2017  | A/Milano/111/2017 | 3,E+09 |
| 56 | Male   | 42,7 | Mantova       | oropharyngeal swab      | 25 January 2017  | A/Milano/115/2017 | 4,E+07 |
| 57 | Male   | 66,8 | Mantova       | oropharyngeal swab      | 19 January 2017  | A/Milano/97/2017  | 1,E+05 |
| 58 | Male   | 14,1 | Brescia       | oropharyngeal swab      | 24 January 2017  | A/Milano/116/2017 | 1,E+08 |
| 59 | Female | 11,7 | Brescia       | oropharyngeal swab      | 23 January 2017  | A/Milano/117/2017 | 2,E+07 |
| 60 | Male   | 3,7  | Brescia       | oropharyngeal swab      | 19 January 2017  | A/Milano/101/2017 | 1,E+07 |
| 61 | Male   | 82,1 | Brescia       | broncho-alveolar lavage | 24 January 2017  | A/Milano/118/2017 | 2,E+07 |
| 62 | Male   | 60,2 | Brescia       | oropharyngeal swab      | 26 January 2017  | A/Milano/122/2017 | 4,E+06 |
| 63 | Female | 51,9 | Brescia       | oropharyngeal swab      | 30 January 2017  | A/Milano/128/2017 | 9,E+04 |
| 64 | Female | 12,9 | Bergamo       | oropharyngeal swab      | 31 January 2017  | A/Milano/132/2017 | 7,E+05 |
| 65 | Female | 41,1 | Varese        | oropharyngeal swab      | 27 January 2017  | A/Milano/125/2017 | 9,E+05 |
| 66 | Female | 58,2 | Varese        | oropharyngeal swab      | 26 January 2017  | A/Milano/126/2017 | 5,E+05 |
| 67 | Female | 3,0  | Milan         | oropharyngeal swab      | 30 January 2017  | A/Milano/133/2017 | 9,E+05 |
| 68 | Female | 45,7 | Milan         | oropharyngeal swab      | 31 January 2017  | A/Milano/137/2017 | 1,E+06 |
| 69 | Male   | 10,0 | Bergamo       | oropharyngeal swab      | 07 February 2017 | A/Milano/150/2017 | 1,E+05 |
| 70 | Male   | 39,0 | Brescia       | broncho-alveolar lavage | 30 January 2017  | A/Milano/145/2017 | 2,E+05 |
| 71 | Female | 62,0 | Brescia       | broncho-alveolar lavage | 02 February 2017 | A/Milano/146/2017 | 4,E+05 |
| 72 | Female | 75,7 | Brescia       | broncho-alveolar lavage | 02 February 2017 | A/Milano/147/2017 | 3,E+09 |
| 73 | Male   | 0,9  | Brescia       | oropharyngeal swab      | 08 February 2017 | A/Milano/154/2017 | 6,E+05 |
| 74 | Female | 73,0 | Mantova       | oropharyngeal swab      | 10 February 2017 | A/Milano/156/2017 | 6,E+07 |
| 75 | Female | 13,9 | Mantova       | oropharyngeal swab      | 10 February 2017 | A/Milano/157/2017 | 3,E+08 |
| 76 | Female | 43,1 | Brescia       | oropharyngeal swab      | 16 February 2017 | A/Milano/165/2017 | 1,E+07 |
| 77 | Female | 20,2 | Monza-Brianza | broncho-alveolar lavage | 02 December 2016 | A/Milano/179/2017 | 1,E+06 |
| 78 | Male   | 80,5 | Milan         | broncho-alveolar lavage | 04 January 2017  | A/Milano/181/2017 | 2,E+07 |
| 79 | Male   | 82,0 | Monza-Brianza | broncho-alveolar lavage | 11 February 2017 | A/Milano/184/2017 | 3,E+05 |
| 80 | Female | 70,4 | Monza-Brianza | broncho-alveolar lavage | 17 January 2017  | A/Milano/182/2017 | 2,E+07 |
